# Supplementary material
Source: PubMed Central journal article supplement (PMC6169048)
Supplement: Supplemental_Material_7841.pdf [file Supplemental_Material_7841.pdf]

Supplementary material 1. VCE finding of enrolled patients according to age by decade

|                       | Total<br>(n=1,953)   | < 30 yrs<br>(n=183) | 30–39 yrs<br>(n=195) | 40–49 yrs<br>(n=288) | 50–59 yrs<br>(n=371) | 60–69 yrs<br>(n=406) | 70–79 yrs<br>(n=361) | ≥ 80 yrs<br>(n=149) |
|-----------------------|----------------------|---------------------|----------------------|----------------------|----------------------|----------------------|----------------------|---------------------|
|                       | P0/P1 lesions, n (%) | 1,008 (51.6)        | 104 (56.8)           | 121(62.1)            | 163 (56.6)           | 194 (52.3)           | 210 (51.7)           | 164 (45.4)          |
| P0 lesions, n         | 537                  | 67                  | 63                   | 101                  | 108                  | 95                   | 74                   | 29                  |
| P1 lesions, n         | 471                  | 37                  | 57                   | 63                   | 86                   | 115                  | 90                   | 23                  |
| P2 lesions, n (%)     | 945 (48.4)           | 79 (43.2)           | 74 (37.9)            | 125 (43.4)           | 177 (47.7)           | 196 (48.3)           | 197 (54.6)           | 97 (65.1)           |
| Active bleeding, n    | 123                  | 9                   | 11                   | 19                   | 15                   | 30                   | 32                   | 7                   |
| Angiodysplasia, n     | 345                  | 26                  | 13                   | 42                   | 59                   | 77                   | 77                   | 51                  |
| Dieulafoy's lesion, n | 5                    | 1                   | 0                    | 3                    | 0                    | 0                    | 0                    | 1                   |
| Tumor, n              | 63                   | 2                   | 10                   | 6                    | 22                   | 6                    | 11                   | 6                   |
| Small bowel ulcer, n  | 402                  | 41                  | 39                   | 51                   | 80                   | 82                   | 77                   | 32                  |
| Varices, n            | 7                    | 0                   | 1                    | 4                    | 1                    | 1                    | 0                    | 0                   |

Supplementary material 2. Trend of individual P2 lesions in patients with potential small bowel bleeding according to age by decade

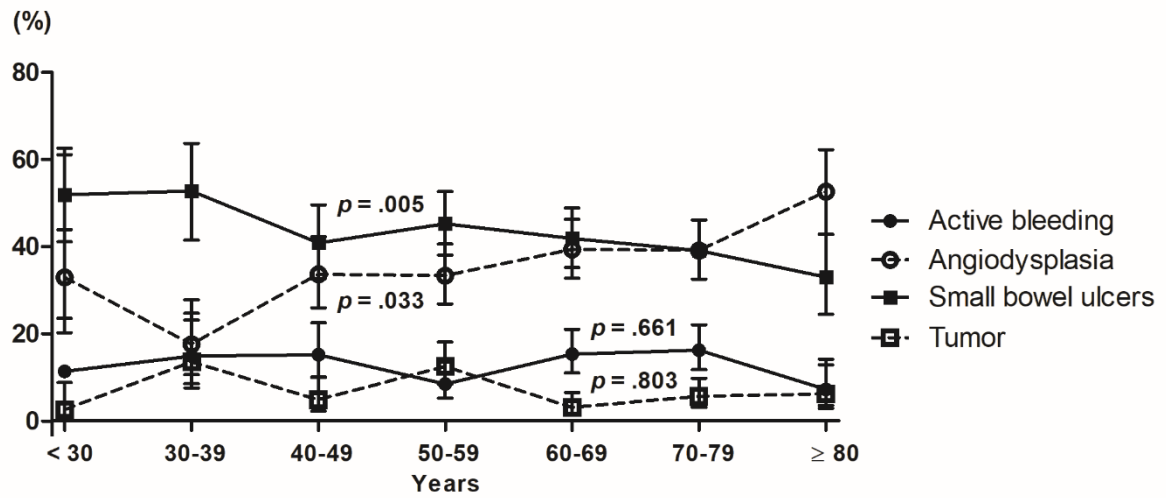

Trends of Dieulafoy's lesion and varices among P2 lesions are not shown here due to small numbers of patients.

Supplementary material 3. Etiologic diagnoses of enrolled patients according to age by decade

|                                            | Age group |           |           |           |           |           |           |
|--------------------------------------------|-----------|-----------|-----------|-----------|-----------|-----------|-----------|
|                                            | < 30 yrs  | 30–39 yrs | 40–49 yrs | 50–59 yrs | 60–69 yrs | 70–79 yrs | ≥ 80 yrs  |
|                                            | (n=183)   | (n=195)   | (n=288)   | (n=371)   | (n=406)   | (n=361)   | (n=149)   |
| Angiodysplasia, n (%)                      | 26 (14.2) | 14 (7.2)  | 39 (13.5) | 58 (15.6) | 80 (19.7) | 75 (20.8) | 51 (34.2) |
| Other vascular disease, n (%)              | 4 (2.2)   | 5 (2.6)   | 10 (3.5)  | 5 (1.3)   | 6 (1.5)   | 8 (2.2)   | 4 (2.7)   |
| Dieulafoy's lesion, n                      | 0         | 0         | 3         | 0         | 0         | 0         | 2         |
| AV malformation, n                         | 2         | 0         | 3         | 0         | 1         | 2         | 1         |
| Hemangioma, n                              | 0         | 0         | 0         | 1         | 0         | 1         | 0         |
| Ischemic enteritis, n                      | 1         | 0         | 1         | 1         | 1         | 4         | 1         |
| Lymphangiectasia, n                        | 0         | 1         | 0         | 1         | 0         | 0         | 0         |
| Varices, n                                 | 0         | 3         | 2         | 1         | 1         | 1         | 0         |
| Portal hypertensive enteropathy, n         | 0         | 0         | 0         | 0         | 2         | 0         | 0         |
| Vasculitis/Henoch-Schonlein purpura, n     | 0         | 1         | 1         | 0         | 1         | 0         | 0         |
| Splenic artery pseudoaneurysm, n           | 0         | 0         | 0         | 1         | 0         | 0         | 0         |
| SMA aneurysm, n                            | 1         | 0         | 0         | 0         | 0         | 0         | 0         |
| Crohn's disease, n (%)                     | 22 (12.0) | 19 (9.7)  | 5 (1.7)   | 7 (1.9)   | 5 (1.2)   | 1 (0.3)   | 0 (0.0)   |
| NSAID enteropathy, n (%)                   | 7 (3.8)   | 7 (3.6)   | 19 (6.6)  | 28 (7.5)  | 39 (9.6)  | 34 (9.4)  | 13 (8.7)  |
| Small bowel ulcers, n (%)                  | 12 (6.6)  | 7 (3.6)   | 35 (12.2) | 41 (11.1) | 44 (10.8) | 53 (14.7) | 17 (11.4) |
| Other inflammatory disease, n (%)          | 9 (4.9)   | 21 (10.8) | 11 (3.8)  | 33 (8.9)  | 31 (7.6)  | 20 (5.5)  | 2 (1.3)   |
| Enteropathy-erosive, n                     | 6         | 14        | 4         | 12        | 16        | 15        | 1         |
| Enteropathy-erythematous/hemorrhagic, n    | 1         | 1         | 1         | 6         | 10        | 2         | 1         |
| Eosinophilic enteritis, n                  | 0         | 1         | 0         | 0         | 1         | 0         | 0         |
| Infectious enteritis, n                    | 0         | 1         | 0         | 2         | 0         | 0         | 0         |
| Intestinal Behcet, n                       | 0         | 2         | 2         | 4         | 2         | 0         | 0         |
| Intestinal tuberculosis, n                 | 1         | 2         | 2         | 4         | 1         | 0         | 0         |
| Radiation enteritis, n                     | 0         | 0         | 0         | 3         | 1         | 3         | 0         |
| Anastomosis site ulcer, n                  | 1         | 0         | 2         | 1         | 0         | 0         | 0         |
| CMUSE, n                                   | 0         | 0         | 0         | 1         | 0         | 0         | 0         |
| Small bowel neoplasia, n (%)               | 4 (2.2)   | 10 (5.1)  | 12 (4.2)  | 23 (6.2)  | 17 (4.2)  | 13 (3.6)  | 6 (4.0)   |
| Small bowel malignant tumor, n             | 0         | 0         | 2         | 3         | 2         | 1         | 0         |
| GIST, n                                    | 1         | 5         | 5         | 15        | 9         | 6         | 4         |
| Lymphoma, n                                | 1         | 0         | 1         | 2         | 0         | 3         | 1         |
| Metastatic cancer, n                       | 0         | 0         | 0         | 0         | 3         | 1         | 0         |
| FAP, n                                     | 0         | 0         | 1         | 0         | 0         | 0         | 0         |
| Peutz-Jegher syndrome, n                   | 1         | 1         | 0         | 0         | 1         | 0         | 0         |
| Small bowel benign tumor, n                | 1         | 2         | 1         | 0         | 1         | 1         | 0         |
| Submucosal tumor, n                        | 0         | 2         | 2         | 3         | 1         | 1         | 1         |
| Diverticular disease, n (%)                | 11 (6.0)  | 3 (1.5)   | 0 (0.0)   | 4 (1.1)   | 2 (0.5)   | 1 (0.3)   | 1 (0.7)   |
| Meckel's diverticulum, n                   | 8         | 3         | 0         | 2         | 0         | 0         | 0         |
| Unspecified diverticulum, n                | 3         | 0         | 0         | 2         | 2         | 1         | 1         |
| Disease outside small bowel, n (%)         | 12 (6.6)  | 17 (8.7)  | 17 (5.9)  | 35 (9.4)  | 32 (7.9)  | 23 (6.4)  | 14 (9.4)  |
| Epistaxis, n                               | 0         | 0         | 0         | 1         | 0         | 0         | 0         |
| Esophagus, n                               | 0         | 0         | 2         | 4         | 2         | 1         | 0         |
| Stomach, n                                 | 2         | 3         | 2         | 10        | 8         | 6         | 4         |
| Duodenum (proximal to ampulla of Vater), n | 4         | 8         | 3         | 3         | 5         | 4         | 2         |
| Hepatobiliary tract, n                     | 0         | 1         | 0         | 0         | 0         | 1         | 1         |
| Colorectum and anus, n                     | 6         | 4         | 11        | 17        | 17        | 11        | 7         |
| Other disease, n (%)                       | 1 (0.5)   | 1 (0.5)   | 1 (0.3)   | 3 (0.8)   | 6 (1.5)   | 2 (0.6)   | 2 (1.3)   |

|                                          |           |           |            |            |            |            |           |
|------------------------------------------|-----------|-----------|------------|------------|------------|------------|-----------|
| Amyloidosis, n                           | 0         | 0         | 0          | 0          | 1          | 0          | 0         |
| Congestive enteropathy, n                | 0         | 0         | 0          | 1          | 1          | 0          | 0         |
| Intussusception, n                       | 0         | 0         | 2          | 0          | 0          | 2          | 0         |
| Parasite infestation, n                  | 0         | 0         | 0          | 0          | 1          | 1          | 0         |
| Post-surgical anastomosis stricture, n   | 0         | 1         | 0          | 1          | 2          | 0          | 2         |
| Foreign body, n                          | 0         | 0         | 1          | 0          | 0          | 1          | 0         |
| Malabsorption syndrome, n                | 0         | 0         | 0          | 0          | 1          | 0          | 0         |
| Protein losing enteropathy, n            | 1         | 0         | 0          | 0          | 0          | 0          | 0         |
| Obscure gastrointestinal bleeding, n (%) | 75 (41.0) | 91 (46.7) | 139 (48.3) | 134 (36.1) | 144 (35.5) | 131 (36.3) | 39 (26.2) |
| P0 lesion, n                             | 55        | 55        | 91         | 83         | 77         | 64         | 22        |
| P1 lesion, n                             | 20        | 36        | 48         | 51         | 67         | 67         | 17        |

SMA, superior mesenteric artery; NSAID, nonsteroidal anti-inflammatory drug; CMUSE, cryptogenic multifocal ulcerous stenosing enteritis; GIST, gastrointestinal stromal tumor; FAP, familial adenomatous polyposis.

Supplementary material 4. Decision tree analysis using CHAID algorithm

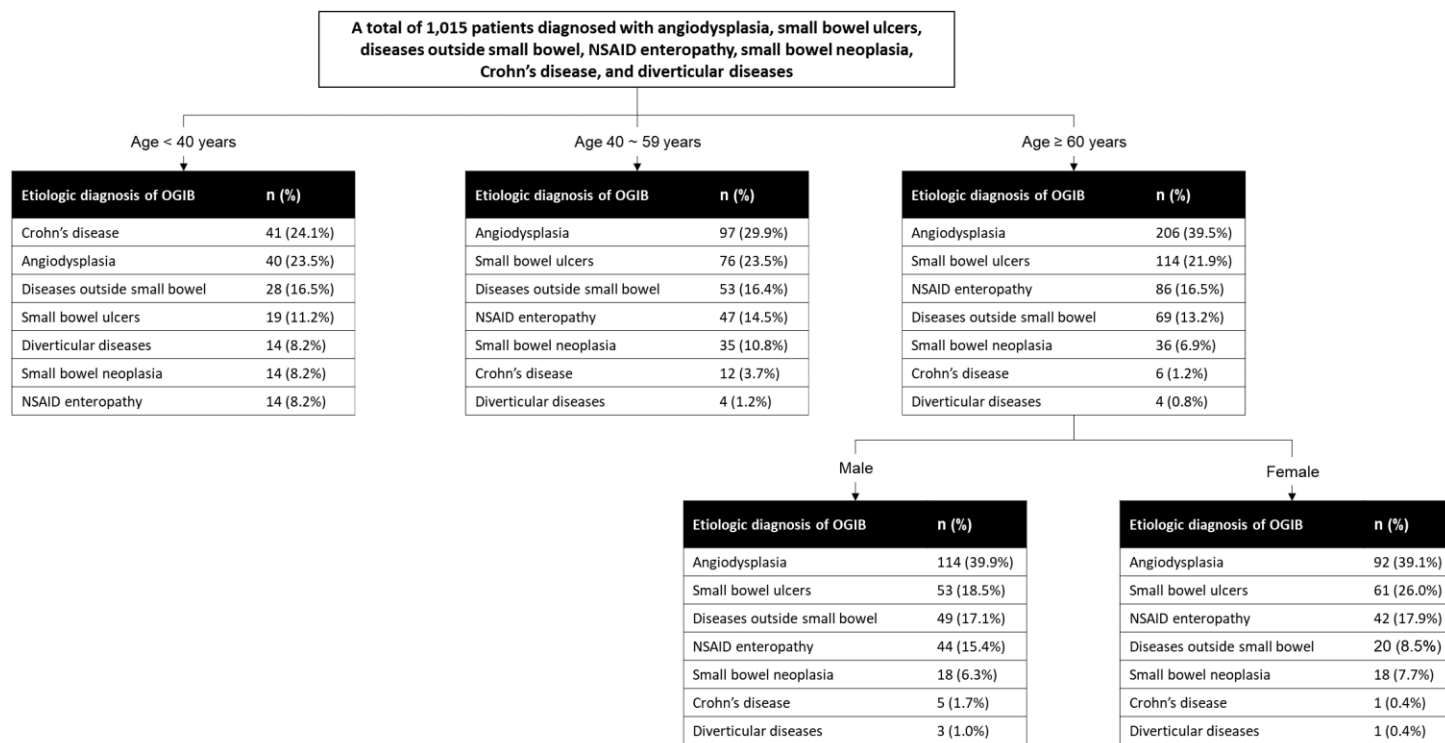

Supplementary material 5. Multivariate analysis of the risk of positive VCE findings (P2 lesions)

|                          |                         | N of positive finding (%) | Univariate analysis |          | Multivariate analysis |          |
|--------------------------|-------------------------|---------------------------|---------------------|----------|-----------------------|----------|
|                          |                         |                           | OR (95% CI)         | <i>P</i> | OR* (95% CI)          | <i>P</i> |
| Age group                | + 10 years              |                           | 1.15 (1.09-1.21)    | <.001    | 1.14 (1.08-1.20)      | <.001    |
|                          | Young adult (< 40 yrs)  | 153 (40.5)                | 1                   | <.001    | 1                     | <.001    |
|                          | Middle-aged (40-59 yrs) | 302 (45.8)                | 1.24 (0.96-1.60)    |          | 1.18 (0.91-1.53)      |          |
|                          | Elderly (≥60 yrs)       | 490 (53.5)                | 1.68 (1.32-2.15)    |          | 1.60 (1.25-2.05)      |          |
| Gender                   | Female                  | 368 (47.5)                | 1                   | .546     | 1                     | .561     |
|                          | Male                    | 577 (48.9)                | 1.06 (0.88-1.27)    |          | 1.06 (0.88-1.28)      |          |
| Clinical presentation    | Occult bleeding         | 159 (35.2)                | 1                   | <.001    | 1                     | <.001    |
|                          | Overt bleeding          | 786 (52.4)                | 2.03 (1.63-2.52)    |          | 1.93 (1.55-2.41)      |          |
| When VCE was performed   | Mar 2003–Aug 2008       | 470 (50.9)                | 1                   | .038     | 1                     | .101     |
|                          | Sep 2008–Dec 2014       | 475 (46.2)                | 0.83 (0.69-0.99)    |          | 0.85 (0.71-1.02)      |          |
| Bowel preparation status | Excellent, good         | 598 (48.9)                | 1                   | .560     | 1                     | .524     |
|                          | Fair, poor              | 347 (47.5)                | 0.95 (0.79-1.14)    |          | 0.94 (0.78-1.14)      |          |

VCE, video capsule endoscopy.

\*Adjusted for age group, gender, clinical presentation, when VCE was performed, and bowel preparation status.
